# Supplementary material for: Structural Impact of the Interaction of the Influenza A Virus Nucleoprotein with Genomic RNA Segments
Source: MDPI journal article supplement (doi:10.3390/v16030421), 2024-03-09
Supplement: s1 [file s1]

# Supplementary Material

## Interaction of the influenza A virus nucleoprotein with genomic RNA segments: structural impact and implications for genome packaging

Erwan Quignon <sup>1</sup>, Damien Ferhadian <sup>1</sup>, Antoine Hache <sup>1</sup>, Valérie Vivet-Boudou <sup>1</sup>, Catherine Isel<sup>1</sup>, Anne Printz-Schweigert <sup>1+</sup>, Amélie Donchet<sup>2</sup>, Thibaut Crépin <sup>2</sup>, and Roland Marquet <sup>1\*</sup>

<sup>1</sup> Université de Strasbourg, CNRS, Architecture et Réactivité de l'ARN, UPR9002, 67000 Strasbourg, France

<sup>2</sup> Institut de Biologie Structurale (IBS), CEA, CNRS, University Grenoble Alpes, Grenoble, France

+ This article is dedicated to the memory of Anne Printz-Schweigert

\* Correspondence: r.marquet@ibmc-cnrs.unistra.fr; Tel.: +33 3 88 41 70 68

### Supplementary Data

#### Data S1

*See accompanying excel file*

**SHAPE reactivity values for the NS and M vRNA under the NoNP, ProtK and Comp conditions.** Reactivity values of each replicate as well as the mean reactivity values are indicated. In these tables, numbering of the nucleotides is from 5' to 3' of the vRNAs. The absence of data is indicated by -999.

#### Data S2

*See accompanying excel file*

**Regions of the NS and M vRNAs protected from NMIA modification upon addition of NP protein.** Sequence of the protected regions longer than one nucleotide are from 3' to 5'.

### Supplementary Table

*See next page*

### Supplementary Figures

*See next pages*

**Table S1: Correlation of the SHAPE reactivity values obtained from three independent replicates for M and NS vRNAs under the NoNP, ProtK and Comp conditions**

|                | M vRNA |       |      |                | NS vRNA |       |      |
|----------------|--------|-------|------|----------------|---------|-------|------|
|                | NoNP   | ProtK | Comp |                | NoNP    | ProtK | Comp |
| Rep 1 vs rep 2 | 0,90   | 0,69  | 0,96 | Rep 1 vs rep 2 | 0,79    | 0,83  | 0,96 |
| Rep 1 vs rep 3 | 0,89   | 0,94  | 0,96 | Rep 1 vs rep 3 | 0,74    | 0,84  | 0,96 |
| Rep 2 vs rep 3 | 0,89   | 0,81  | 0,97 | Rep 2 vs rep 3 | 0,76    | 0,89  | 0,95 |

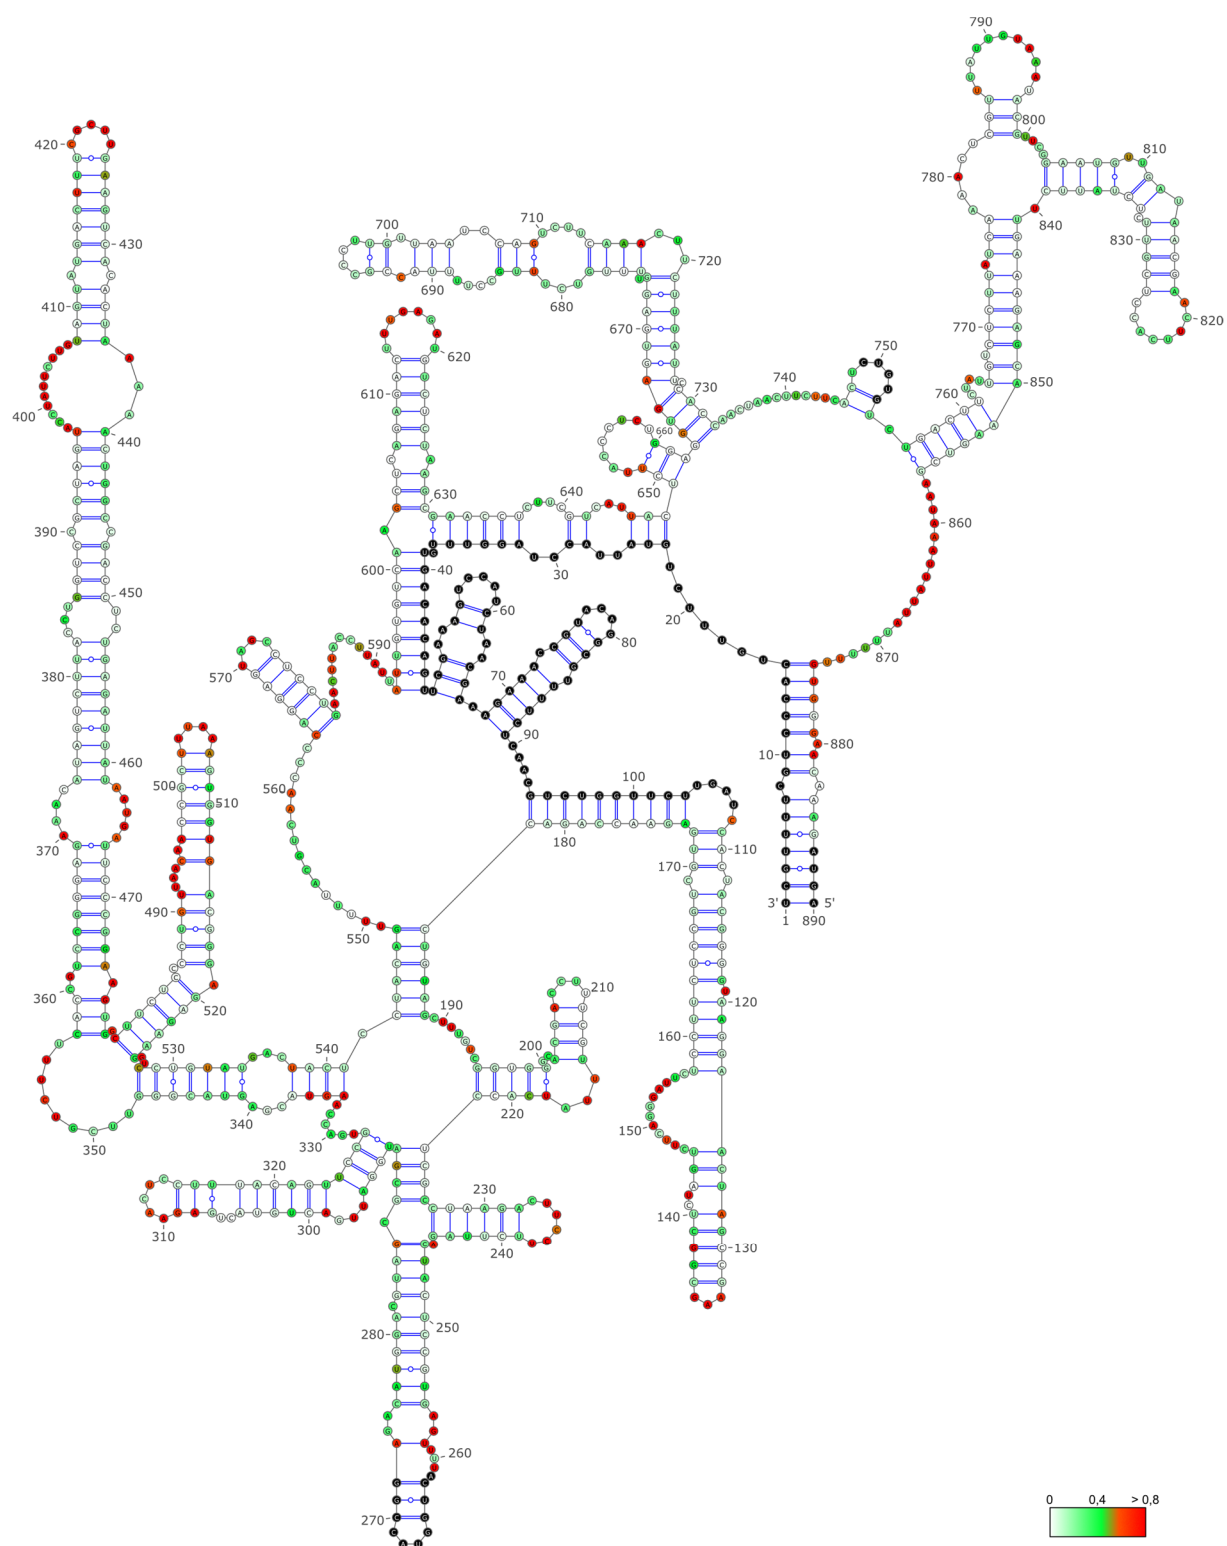

**Figure S1a**  
(continued)

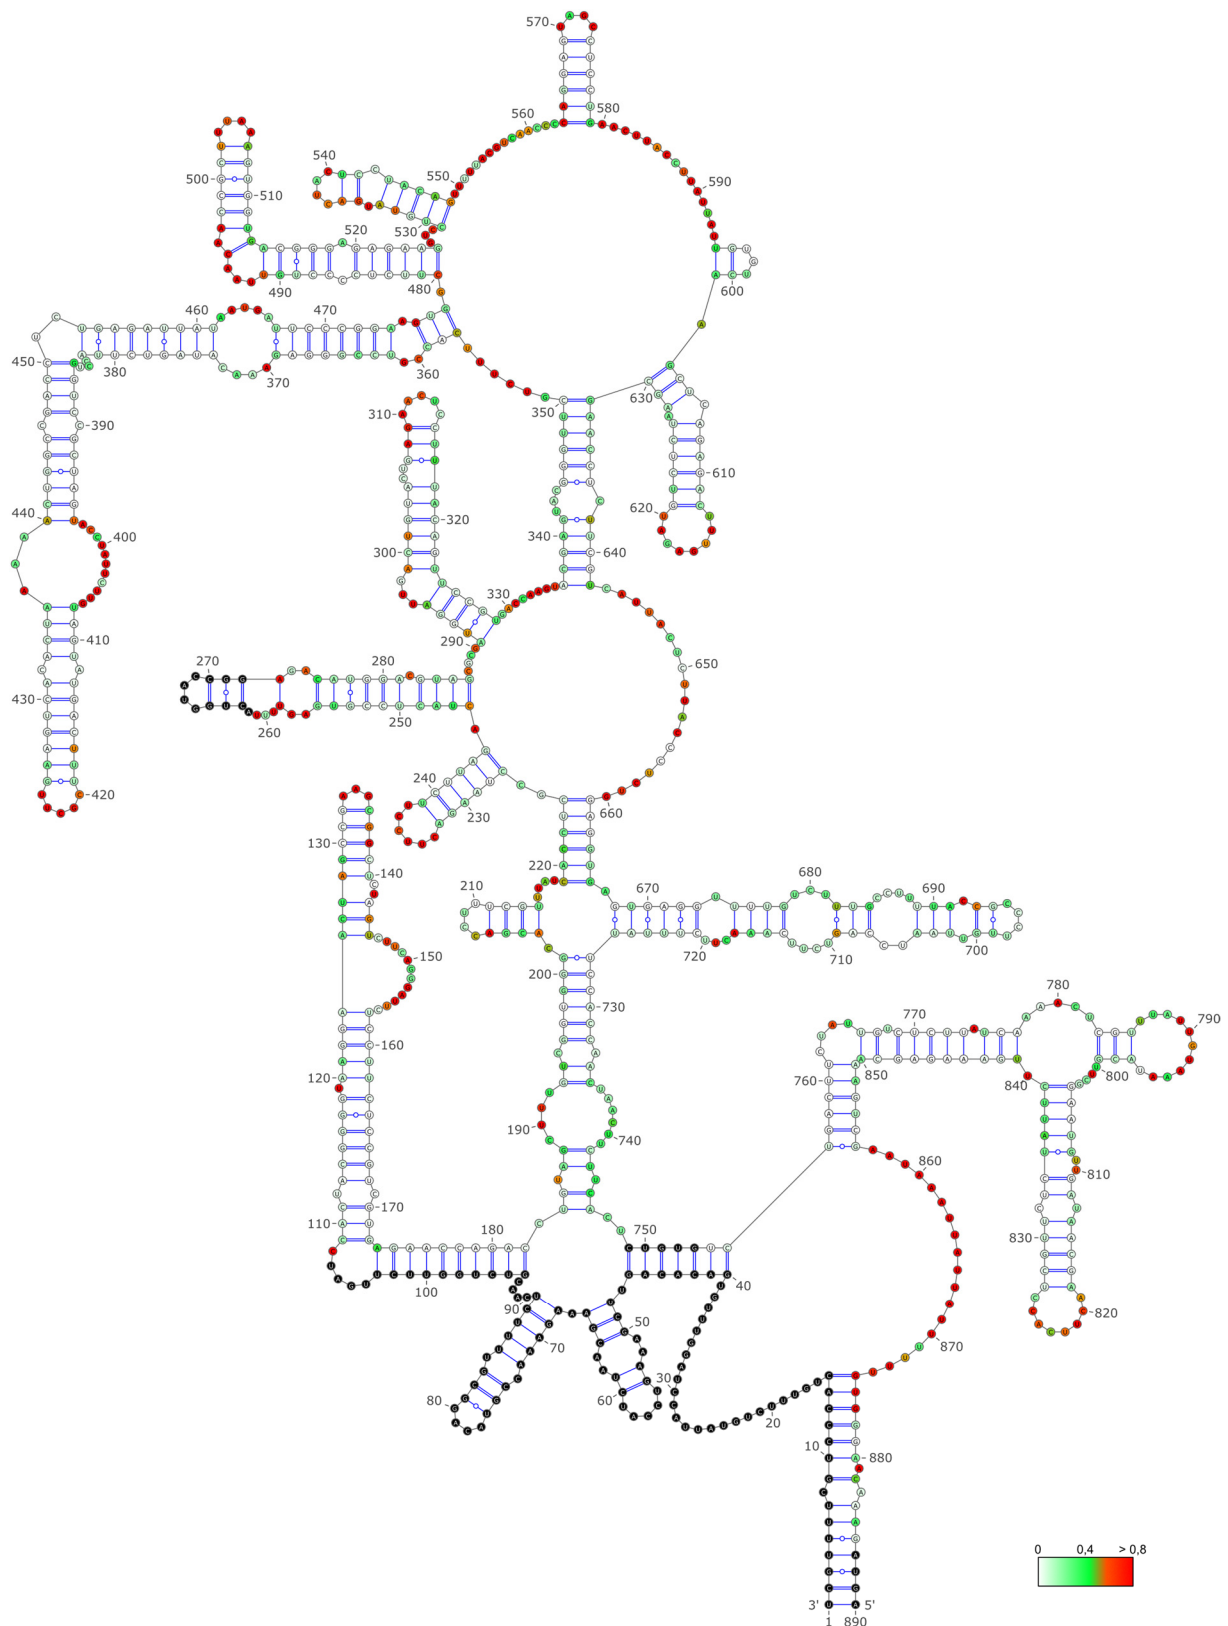

**Figure S1b**

**Figure S1: Secondary structure models of the NS vRNA under the NoNP and ProtK conditions.** These models were predicted using the SHAPE reactivity data obtained under the (a) NoNP or (b) ProtK conditions as constraints. Nucleotides of the vRNA are numbered from 3' to 5' as per convention in the field of negative strand viruses. SHAPE reactivity values are color coded from white to red as shown in the insert. The absence of data is indicated by black circles.

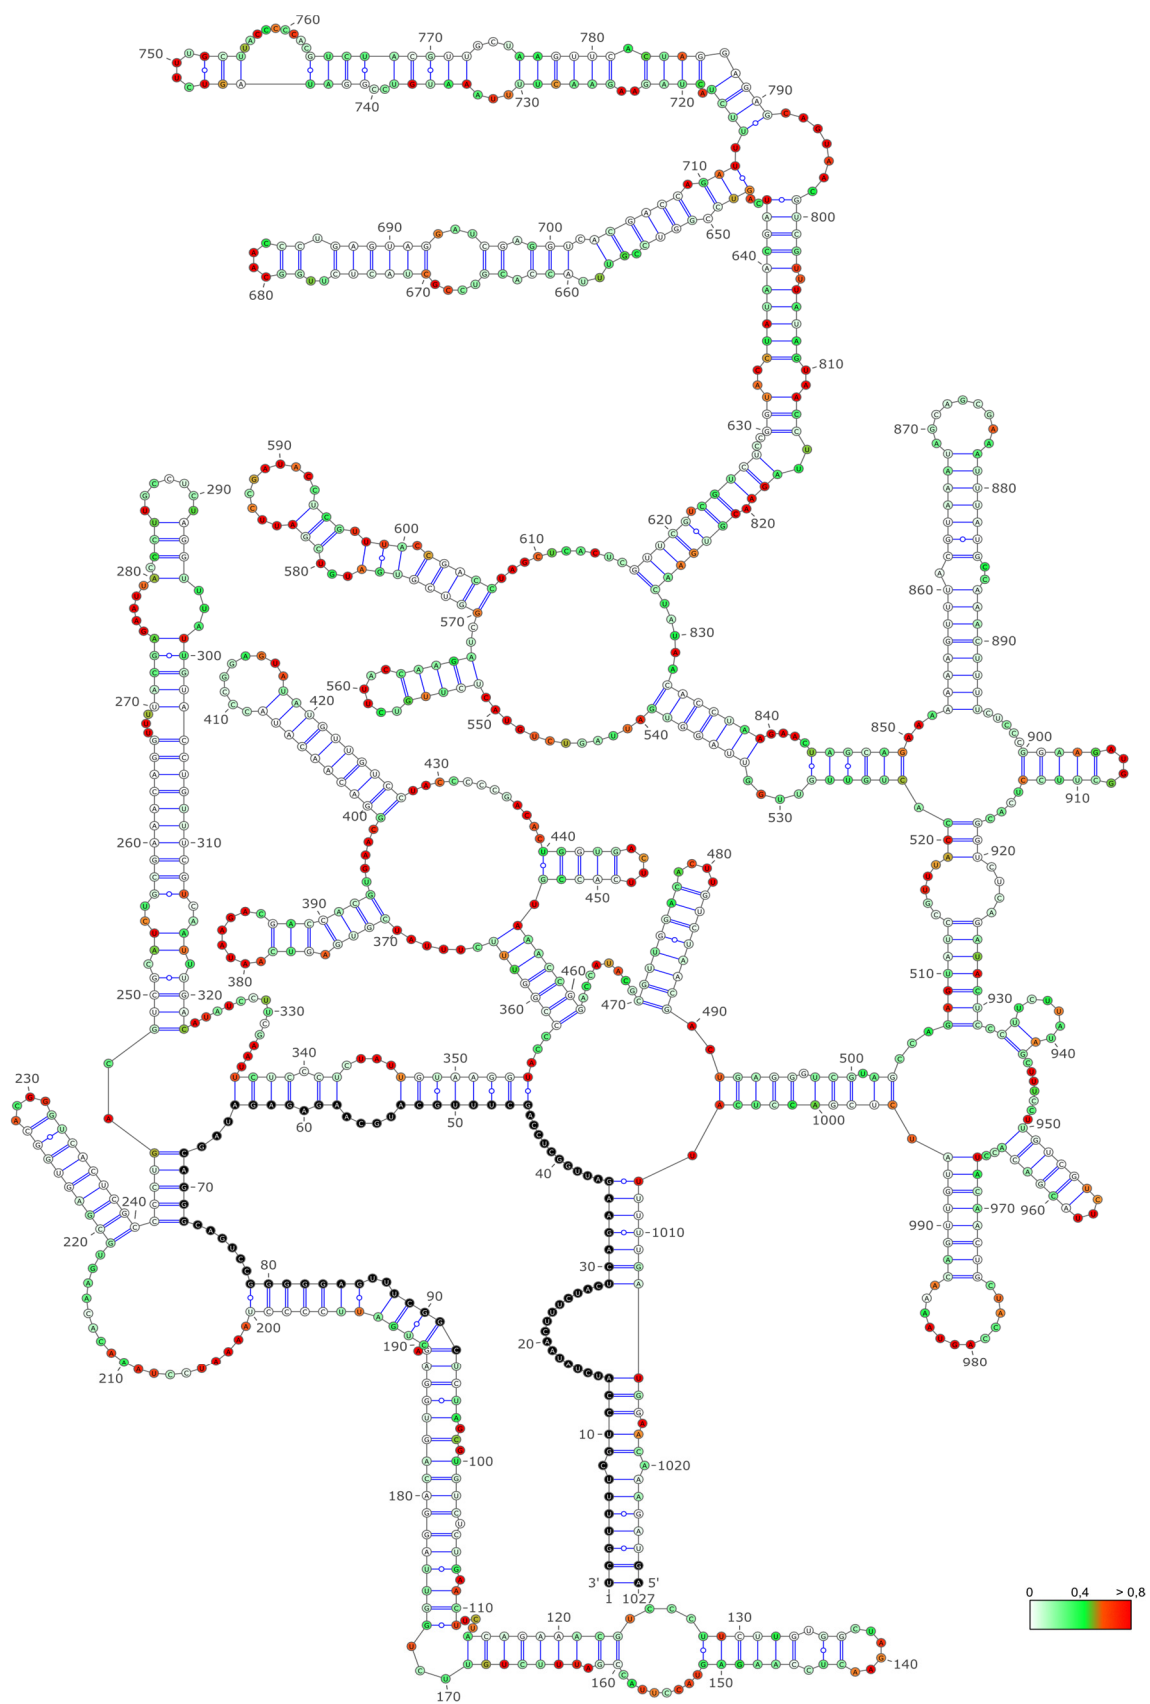

**Figure S2a**  
(continued)

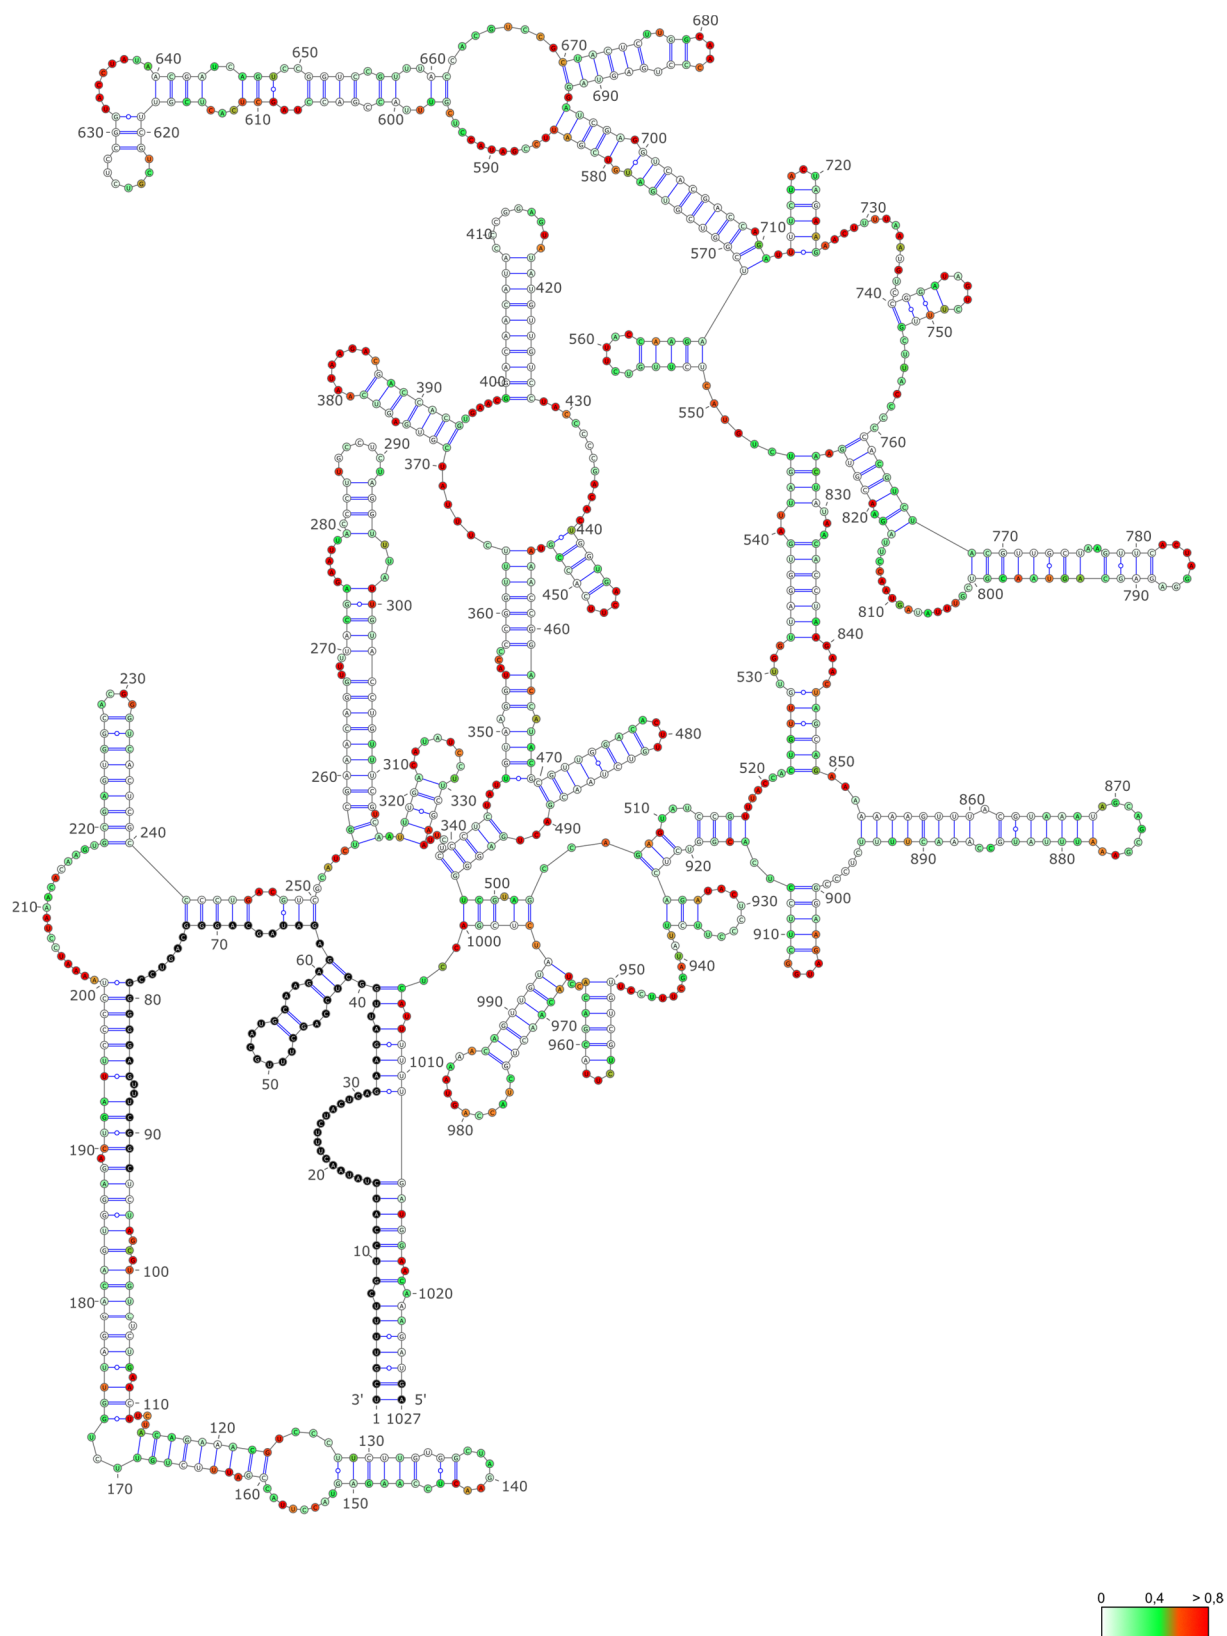

**Figure S2b**

**Figure S2: Secondary structure models of the M vRNA under the NoNP and ProtK conditions.** These models were predicted using the SHAPE reactivity data obtained under the (a) NoNP or (b) ProtK conditions as constraints. Nucleotides of the vRNA are numbered from 3' to 5'. SHAPE reactivity values are color coded from white to red as shown in the insert. The absence of data is indicated by black circles.

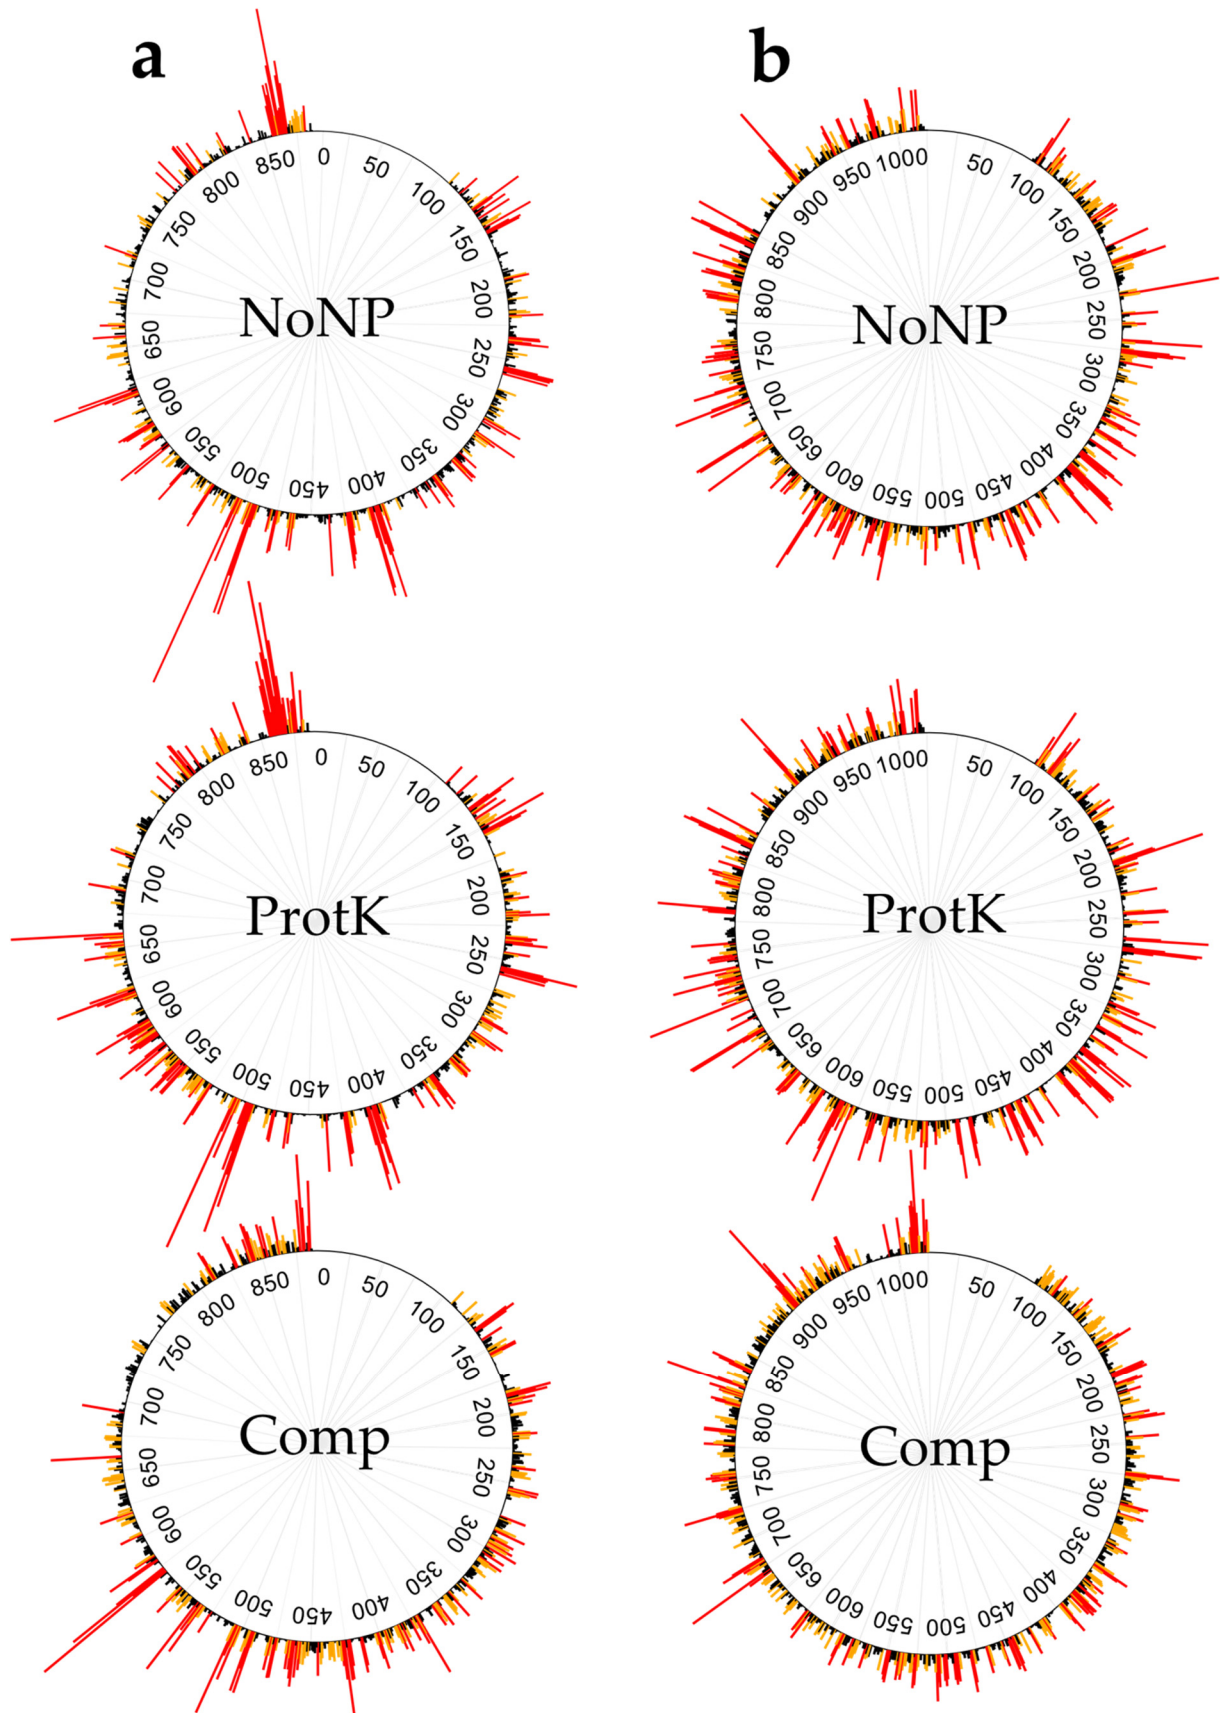

**Figure S3: SHAPE reactivity profiles of the NS (a) and M (b) vRNAs.** For each vRNA, the SHAPE reactivity profiles obtained under the NoNP (top), ProtK (middle) and Comp (bottom) are represented in a circular manner. Nucleotides of the vRNA are numbered from 3' to 5'. Reactivity values are color-coded: <0.4 black, >0.8 red, intermediate: orange.

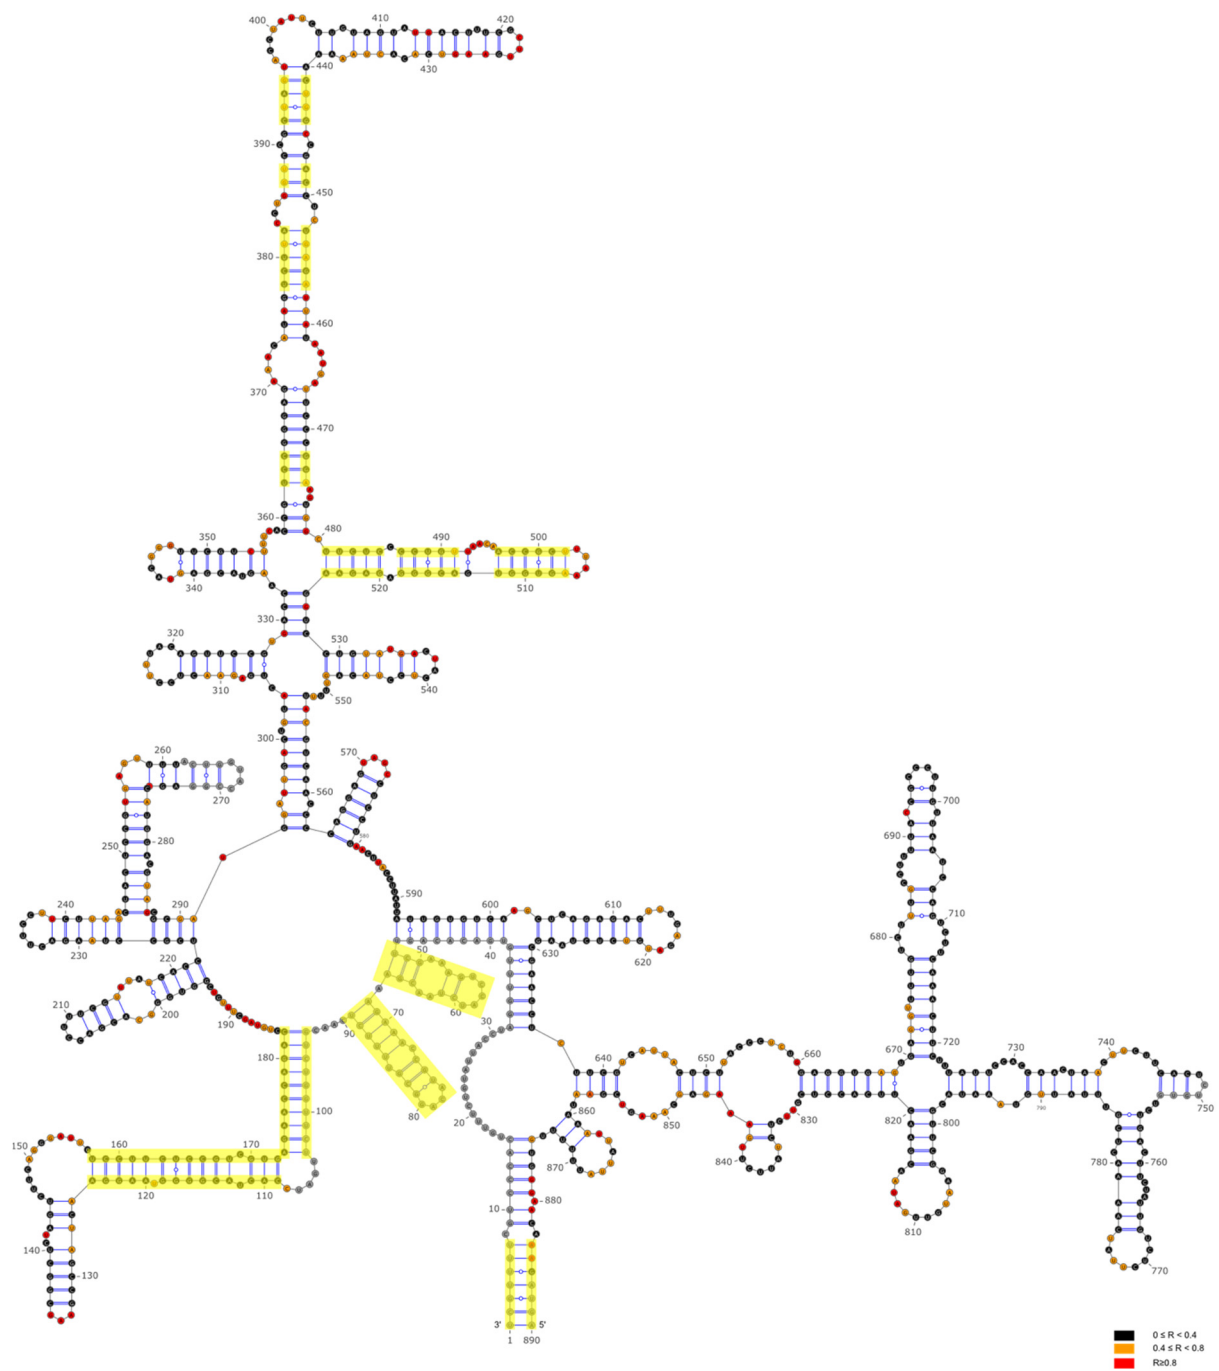

Figure S4a



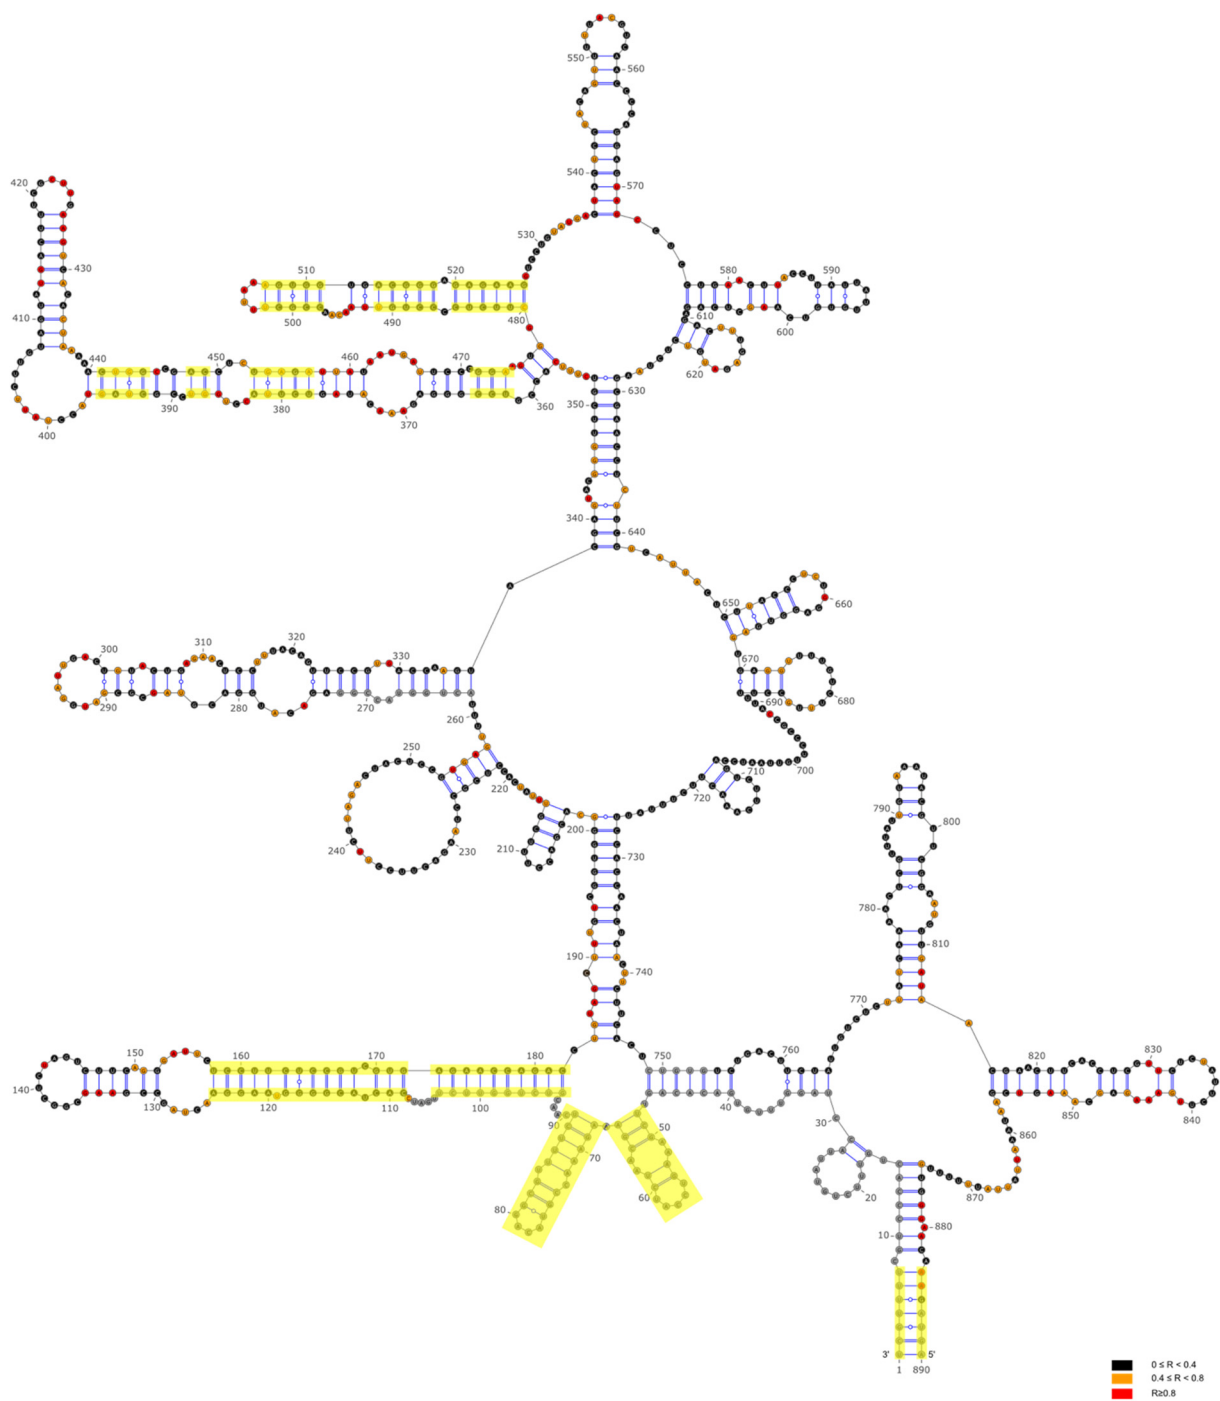

Figure S4b

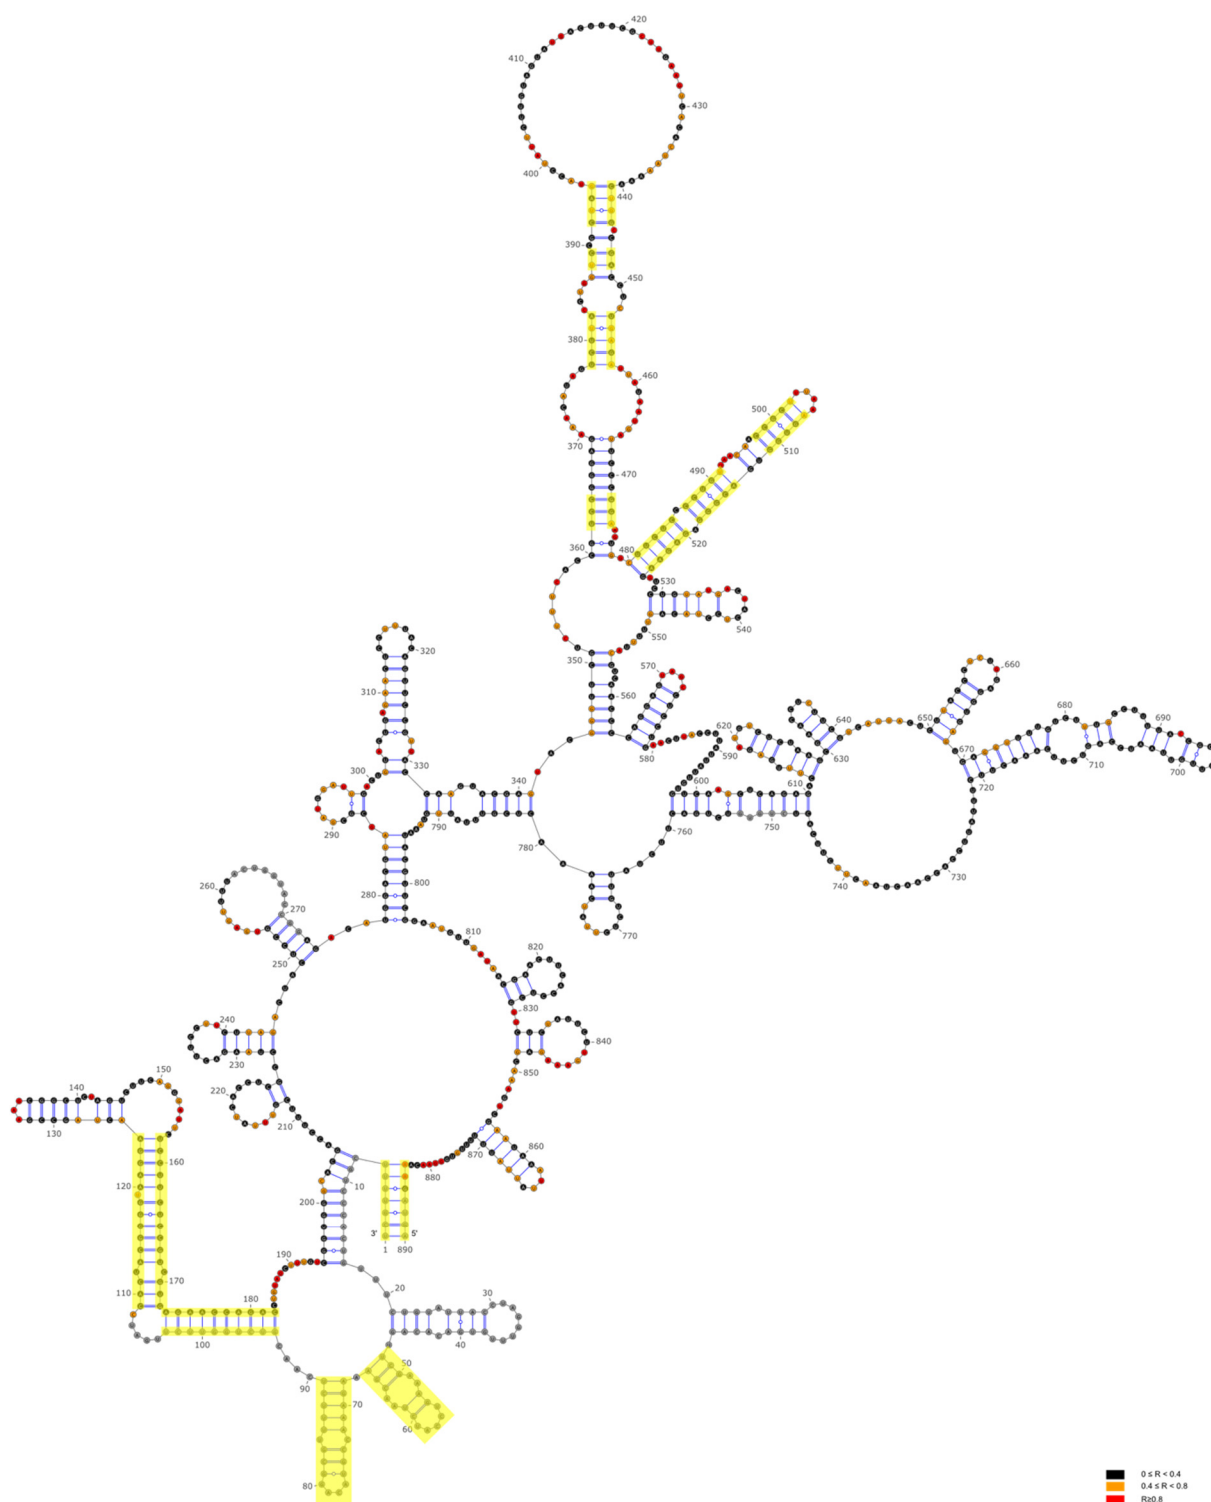

**Figure S4c**

**Figure S4: Predicted secondary structures of the NS vRNA complexed with the NP protein.** These models were predicted (a) using all SHAPE reactivities as pseudo-energies, (b) using only SHAPE reactivities  $> 0.8$  as pseudo-energies or (c) using the SHAPE reactivities  $> 0.8$  as hard constraints (see main text for more explanations). Reactivity of the nts in the vRNA/NP complex are color-coded as indicated in the inset. Base-pairs that are common to the 3 structures are highlighted in yellow.

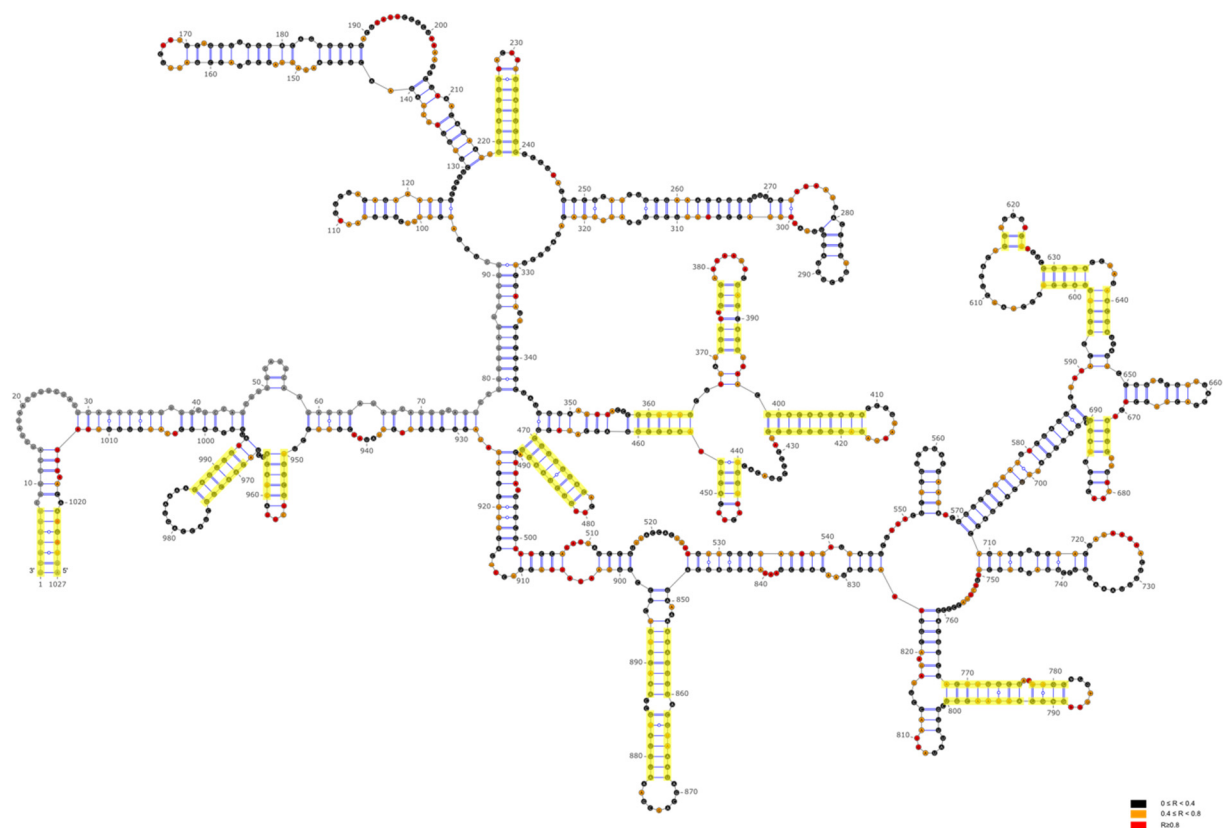

Figure S5a

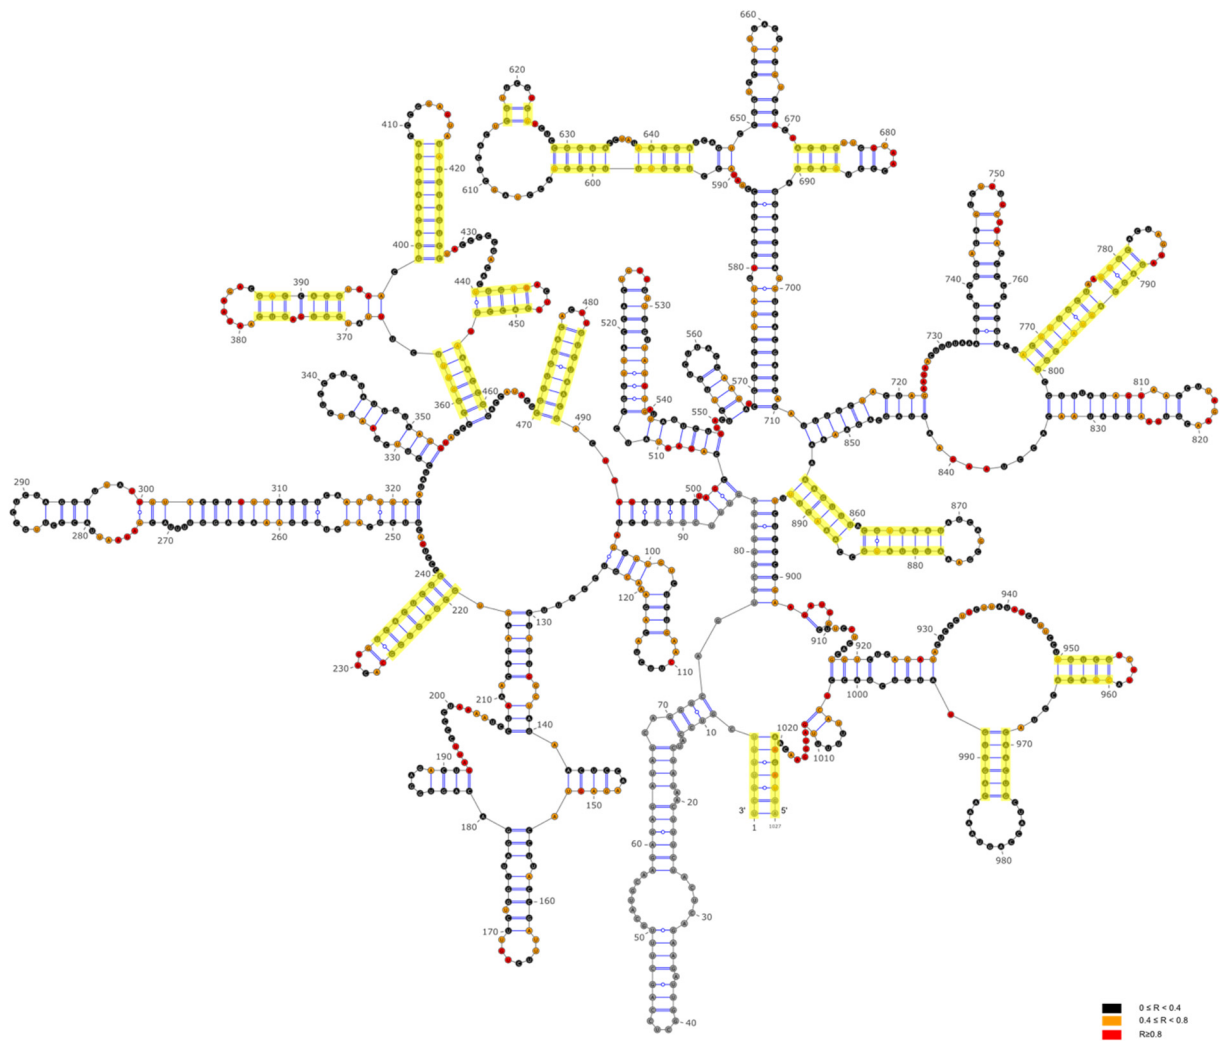

Figure S5b

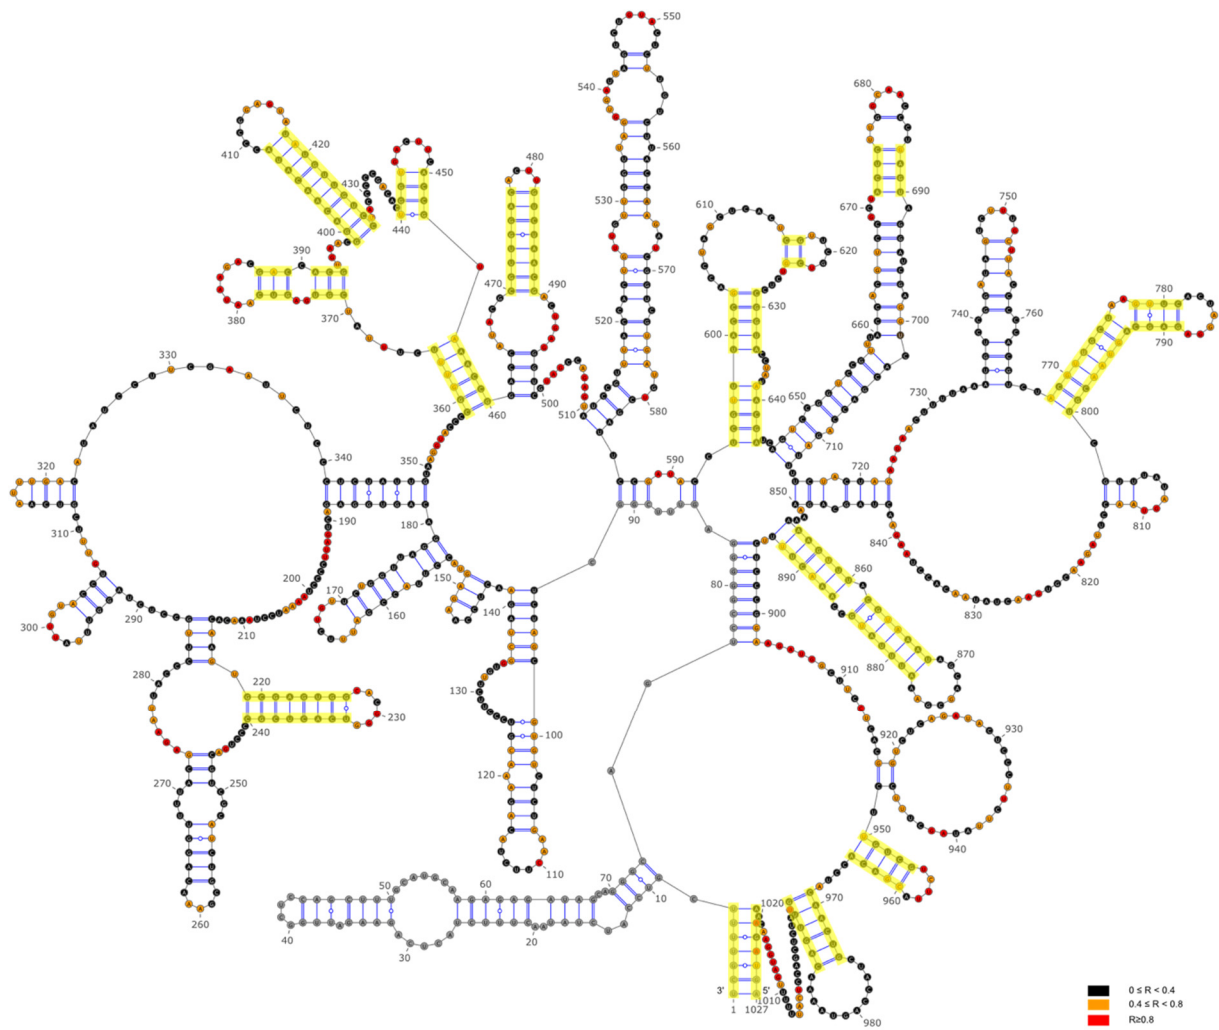

**Figure S5c**

**Figure S5: Predicted secondary structures of the M vRNA complexed with the NP protein.** These models were predicted (a) using all SHAPE reactivities as pseudo-energies, (b) using only SHAPE reactivities  $> 0.8$  as pseudo-energies or (c) using the SHAPE reactivities  $> 0.8$  as hard constraints (see main text for more explanations). Reactivity of the nts in the vRNA/NP complex are color-coded as indicated in the inset. Base-pairs that are common to the 3 structures are highlighted in yellow.
